# Supplementary material
Source: Springer Nature journal article supplement (https://www.springermedizin.de/resource/supplementary/12967_2006_166_MOESM6_ESM.pdf/9575974)

## A. YUMAC (Pxd Sensitive)

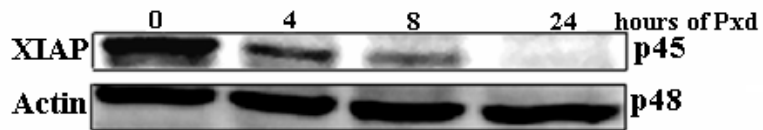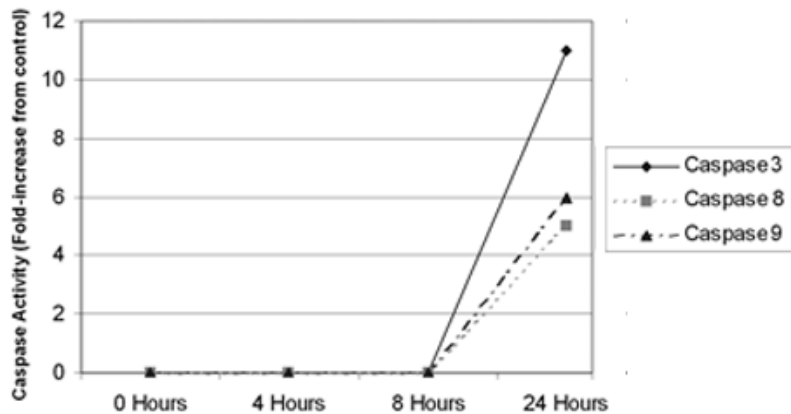

## B. YUSAC (Pxd Resistant)

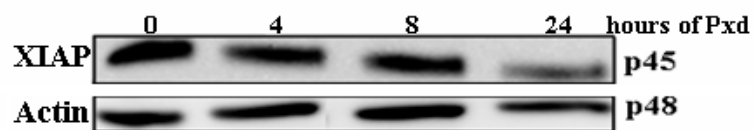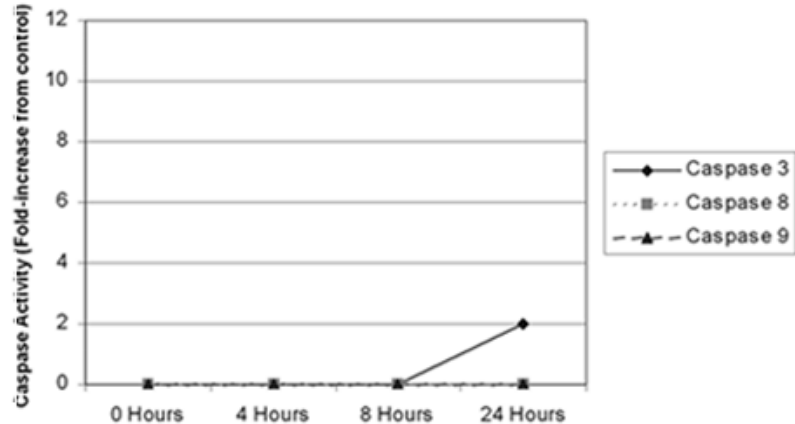

Supplement: MOESM6 [file 9575974]
